# Supplementary material
Source: publisher figshare collection journal article supplement (https://acs.figshare.com/ndownloader/files/10257261)
Supplement: Supplementary file 1 [file 10257261]

## Supporting Information

### Versatile Platform for Controlling Properties of Plant Oil-Based Latex Polymer Networks

Zoriana Demchuk,<sup>1</sup> Ananiy Kohut,<sup>2</sup> Stanislav Voronov,<sup>2</sup> Andriy Voronov<sup>1\*</sup>

<sup>1</sup> *Department of Coatings and Polymeric Materials, North Dakota State University,  
1735 NDSU Research Park Drive, Fargo, ND USA 58105-6050*

<sup>2</sup> *Department of Organic Chemistry, National University Lviv Polytechnic,  
12 Bandery St., Lviv, UKRAINE, 79013*

\*Corresponding author. E-mail address: andriy.voronov@ndsu.edu.

3 pages, 4 Figures

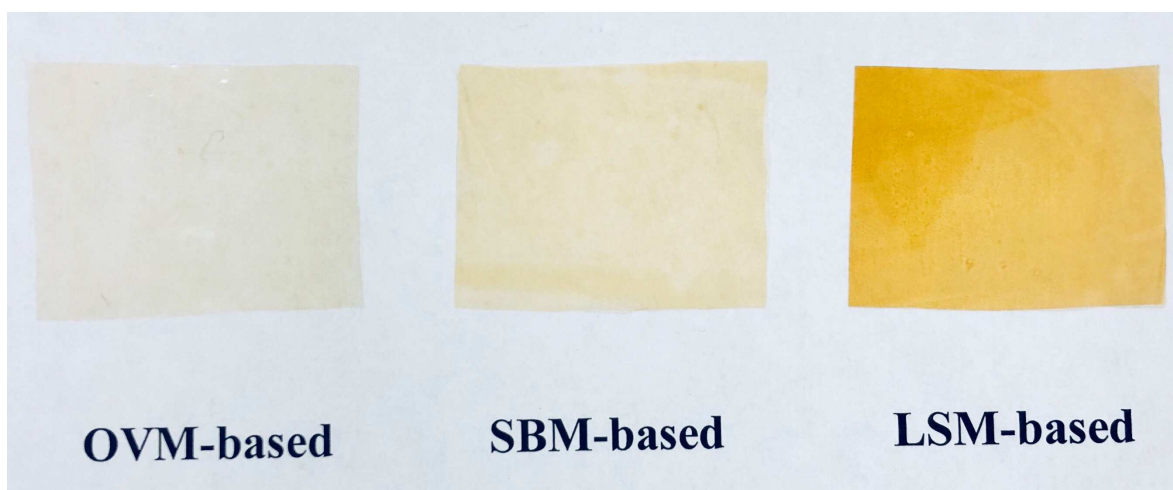

**Figure. S1.** Oxidatively cured POBM-based latex copolymer films with 60 wt.% of biobased content.

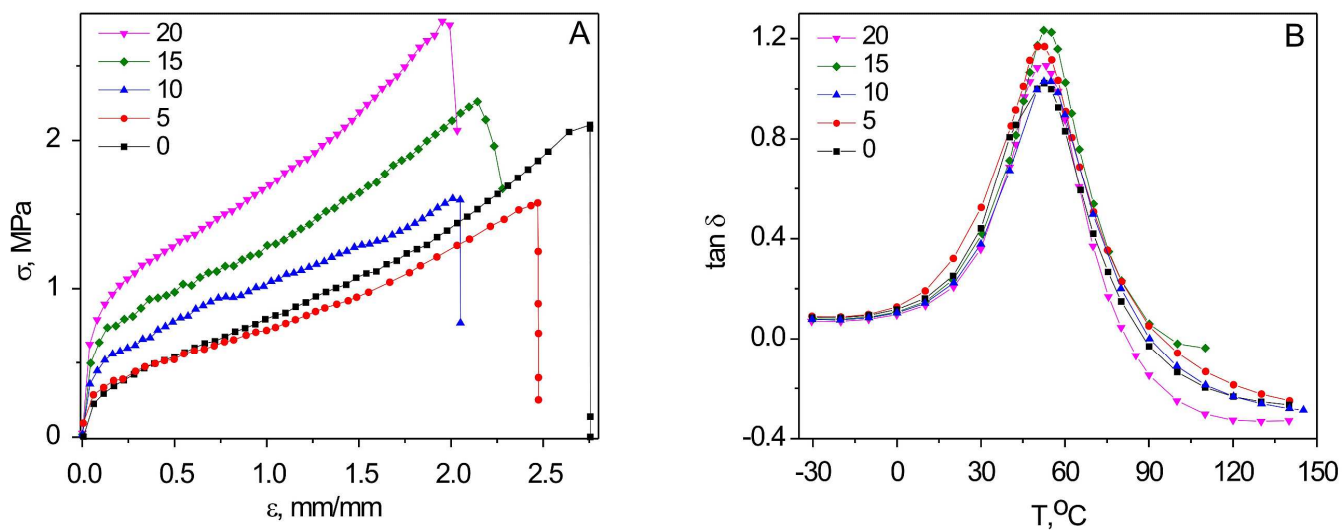

**Figure. S2.** Stress-strain diagrams (A) and the change of  $\tan \delta$  with temperature (B) for OVM-based latex films at increasing HSBM content in copolymerization feed (wt.%).

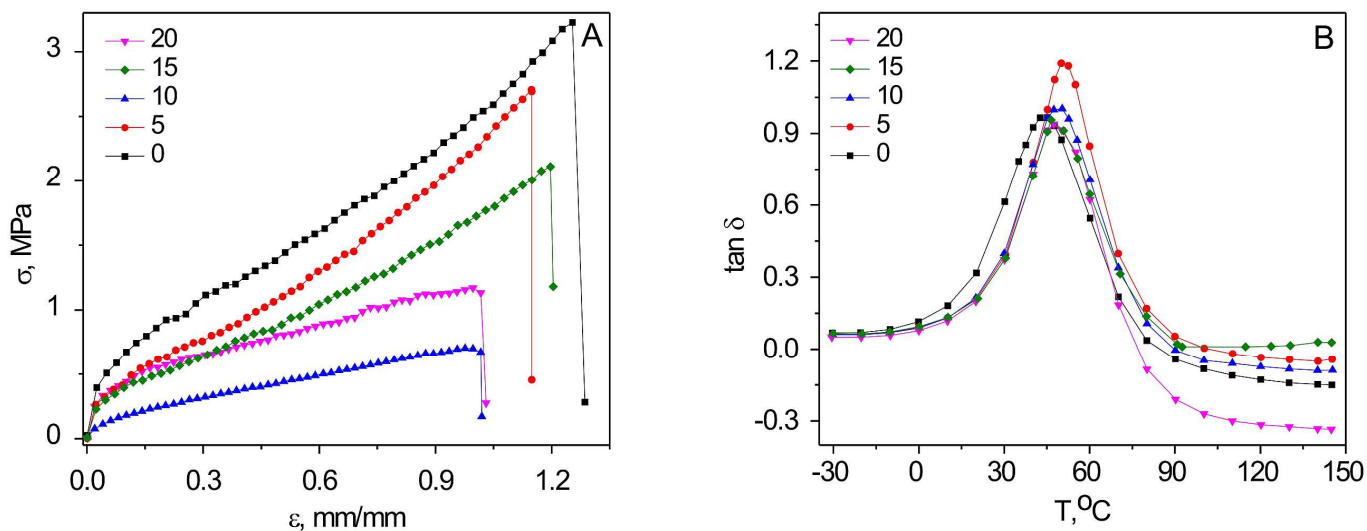

**Figure. S3.** Stress-strain diagrams (A) and the change of  $\tan \delta$  with temperature (B) for SBM-based latex films at increasing HSBM content in copolymerization feed (wt.%).

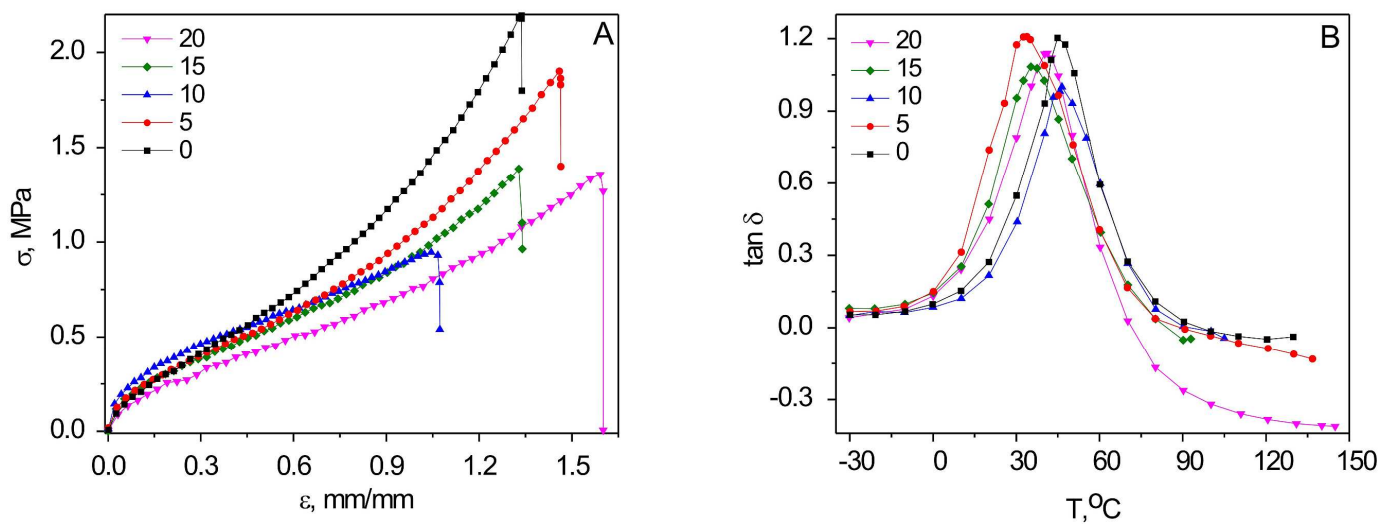

**Figure. S4.** Stress-strain diagrams (A) and the change of  $\tan \delta$  with temperature (B) for LSM-based latex films at increasing HSBM content in copolymerization feed (wt.%).
